# Supplementary material for: Carbon nanofiber@ZIF-8 derived carbon nanosheet composites with a core–shell structure boosting capacitive deionization performance
Source: Royal Society of Chemistry journal article supplement (doi:10.1039/d1ta03804d), 2021-01-01
Supplement: d1ta03804d1.pdf [file d1ta03804d1.pdf]

## Supporting Information

### **Carbon Nanofiber @ ZIF-8 Derived Carbon Nanosheets Composites with Core-shell Structure Boosting Capacitive Deionization Performance**

Xinyi Gong<sup>‡</sup>, Wanxia Luo<sup>‡</sup>, Nannan Guo, Su Zhang, Luxiang Wang\*, Dianzeng Jia\*,  
Lili Ai, and Shizhan Feng

State Key Laboratory of Chemistry and Utilization of Carbon Based Energy Resources;  
Key Laboratory of Advanced Functional Materials, Autonomous Region; Institute of  
Applied Chemistry, College of Chemistry, Xinjiang University, Urumqi, 830046,  
Xinjiang, PR China.

Corresponding author E-mail: [wangluxiangxju@163.com](mailto:wangluxiangxju@163.com) (L. Wang)

<sup>‡</sup> These authors contributed equally to this work.

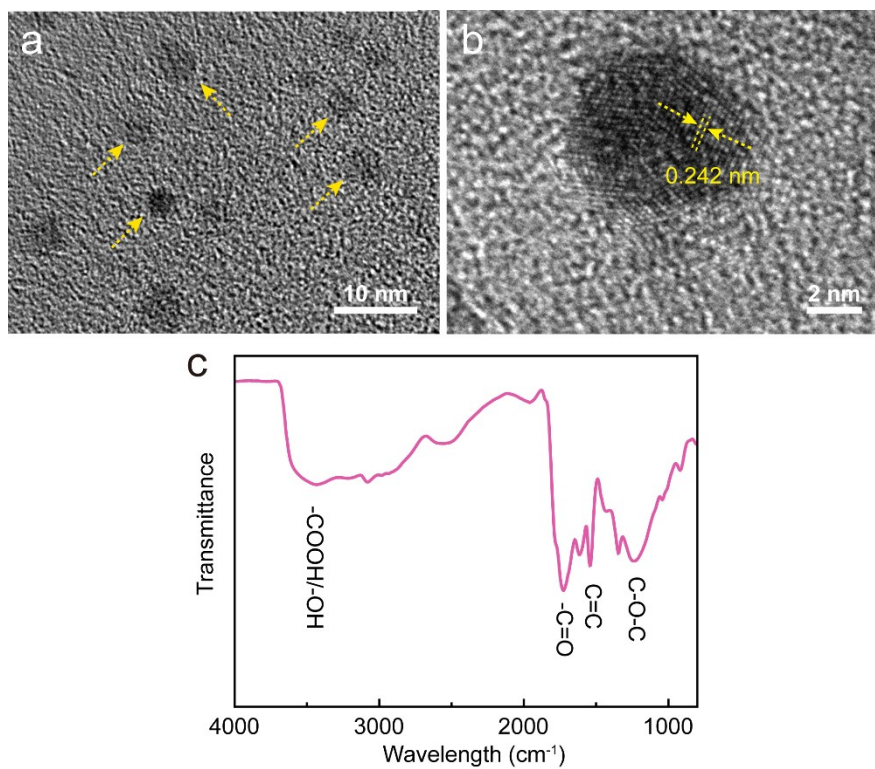

**Figure S1.** (a) Low-magnification and (b) high-resolution TEM images of graphene quantum dots, (c) FT-IR spectrum of graphene quantum dots.

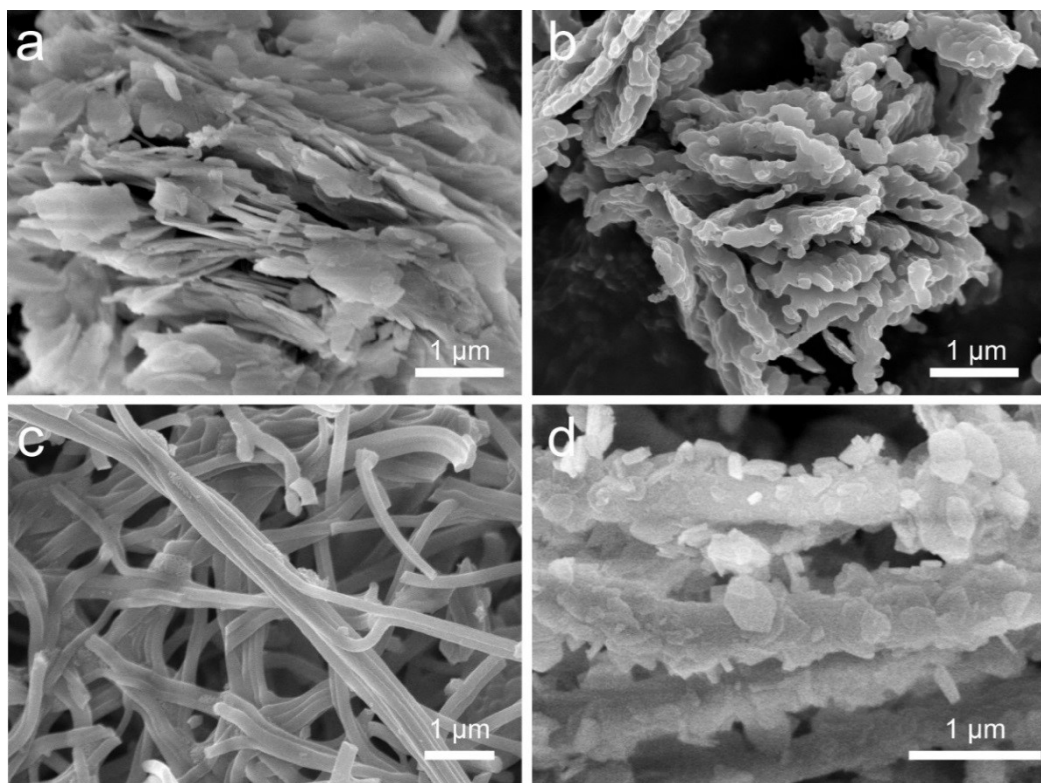

**Figure S2.** SEM images of ZIF-8 nanosheets (a) before and (b) after carbonization ( $C_{ZIF}$ ), (c)  $PAN_{ZIF-10}$ , and (d)  $P-CNF_{ZIF-10}$ .

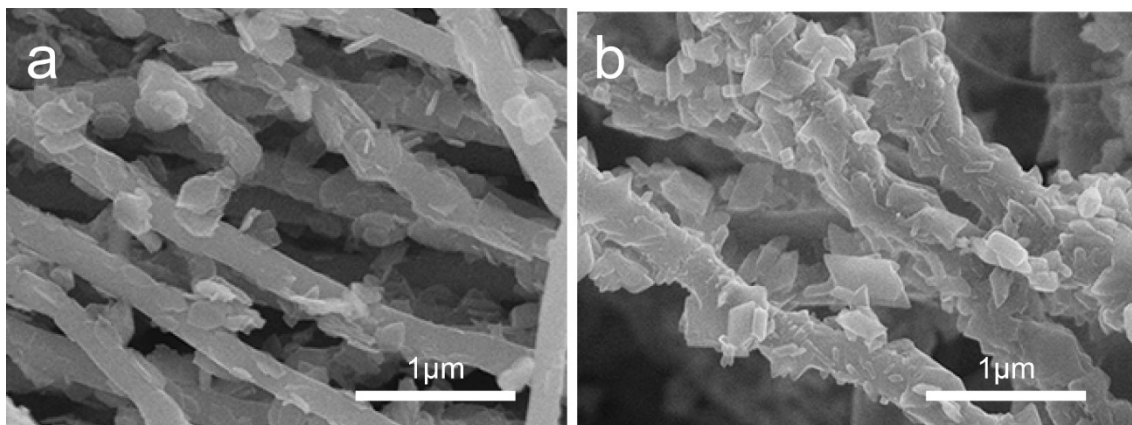

**Figure S3.** SEM images of (a) CNF<sub>ZIF-5</sub> and (b) CNF<sub>ZIF-15</sub>.

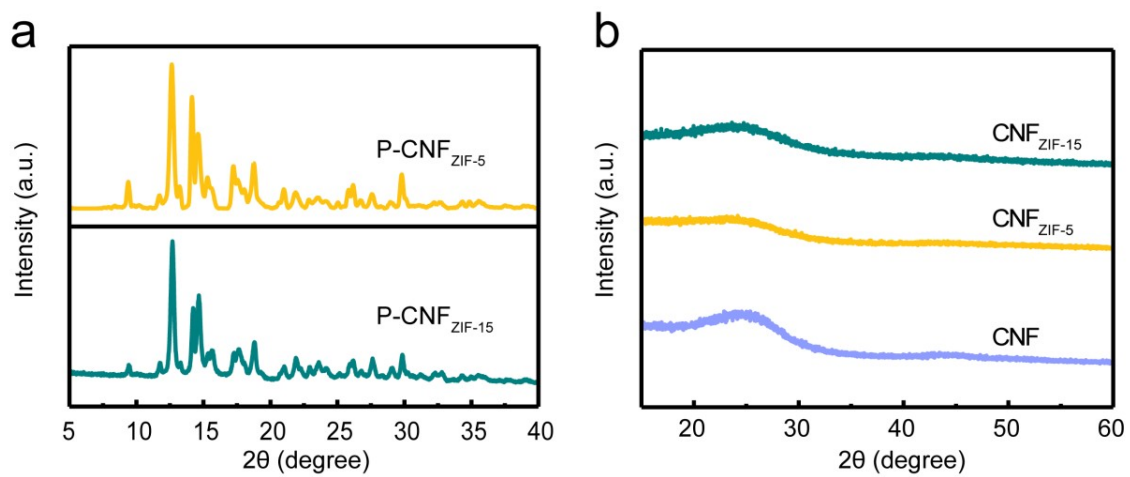

**Figure S4.** The XRD patterns of (a) P-CNF<sub>ZIF-X</sub> and (b) CNF and CNF<sub>ZIF-X</sub>.

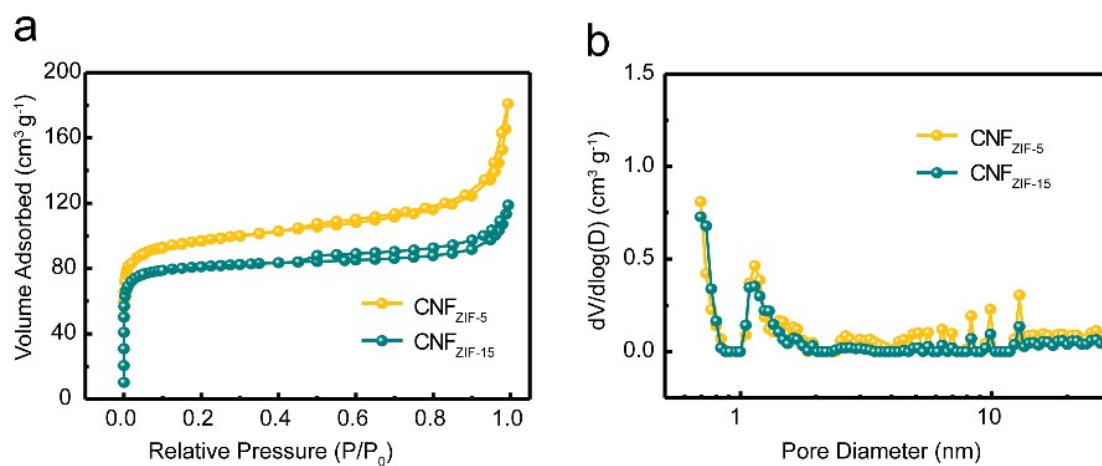

**Figure S5.** (a)  $N_2$  adsorption-desorption isotherms and (b) pore size distribution of CNF<sub>ZIF-5</sub> and CNF<sub>ZIF-15</sub>.

**Table S1** Texture properties derived from  $N_2$  adsorption-desorption isotherms.

| Sample                | $S_{BET}^a$<br>( $m^2 g^{-1}$ ) | $V_{total}^b$<br>( $cm^3 g^{-1}$ ) | $V_{meso}^c$<br>( $cm^3 g^{-1}$ ) | $V_{micro}^d$<br>( $cm^3 g^{-1}$ ) |
|-----------------------|---------------------------------|------------------------------------|-----------------------------------|------------------------------------|
| CNF                   | 244                             | 0.146                              | 0.035                             | 0.111                              |
| CNF <sub>ZIF-5</sub>  | 358                             | 0.209                              | 0.095                             | 0.114                              |
| CNF <sub>ZIF-10</sub> | 416                             | 0.215                              | 0.075                             | 0.140                              |
| CNF <sub>ZIF-15</sub> | 276                             | 0.157                              | 0.044                             | 0.113                              |

<sup>a</sup> Specific surface area calculated by BET method.

<sup>b</sup> Total pore volume .

<sup>c</sup> Volume of mesopores.

<sup>d</sup> Volume of micropores by t-plot method.

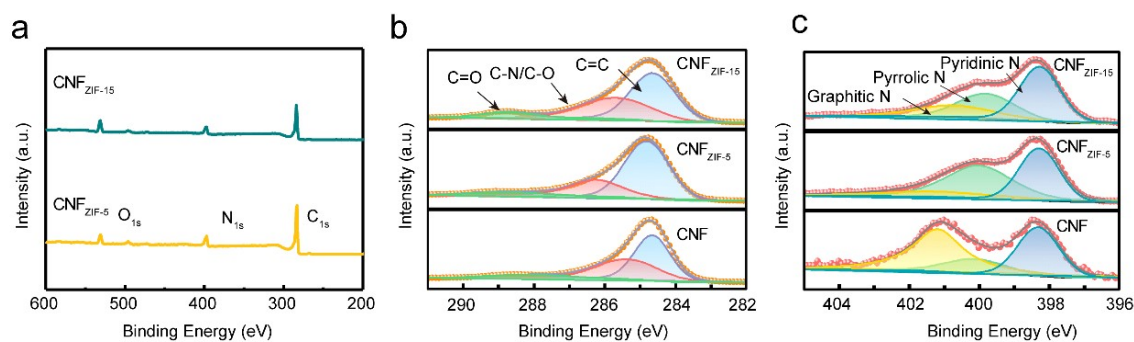

**Figure S6.** (a) XPS survey spectra of CNF<sub>ZIF-5</sub> and CNF<sub>ZIF-15</sub>; (b) C<sub>1s</sub> and (c) N<sub>1s</sub> XPS spectra of CNF, CNF<sub>ZIF-5</sub>, and CNF<sub>ZIF-15</sub>.

**Table S2** Surface composition of the samples derived from XPS analysis (in atomic %)

| Sample                | C    | N    | O    | Pyridinic N | Pyrrolic N | Graphitic N |
|-----------------------|------|------|------|-------------|------------|-------------|
| CNF                   | 82.4 | 6.9  | 10.7 | 27.5        | 12.2       | 60.3        |
| CNF <sub>ZIF-5</sub>  | 80.1 | 12.8 | 7.1  | 37.4        | 47.1       | 15.5        |
| CNF <sub>ZIF-10</sub> | 79.5 | 13.0 | 7.5  | 39.9        | 39.6       | 20.5        |
| CNF <sub>ZIF-15</sub> | 75.3 | 13.1 | 11.6 | 50.7        | 32.3       | 17.0        |

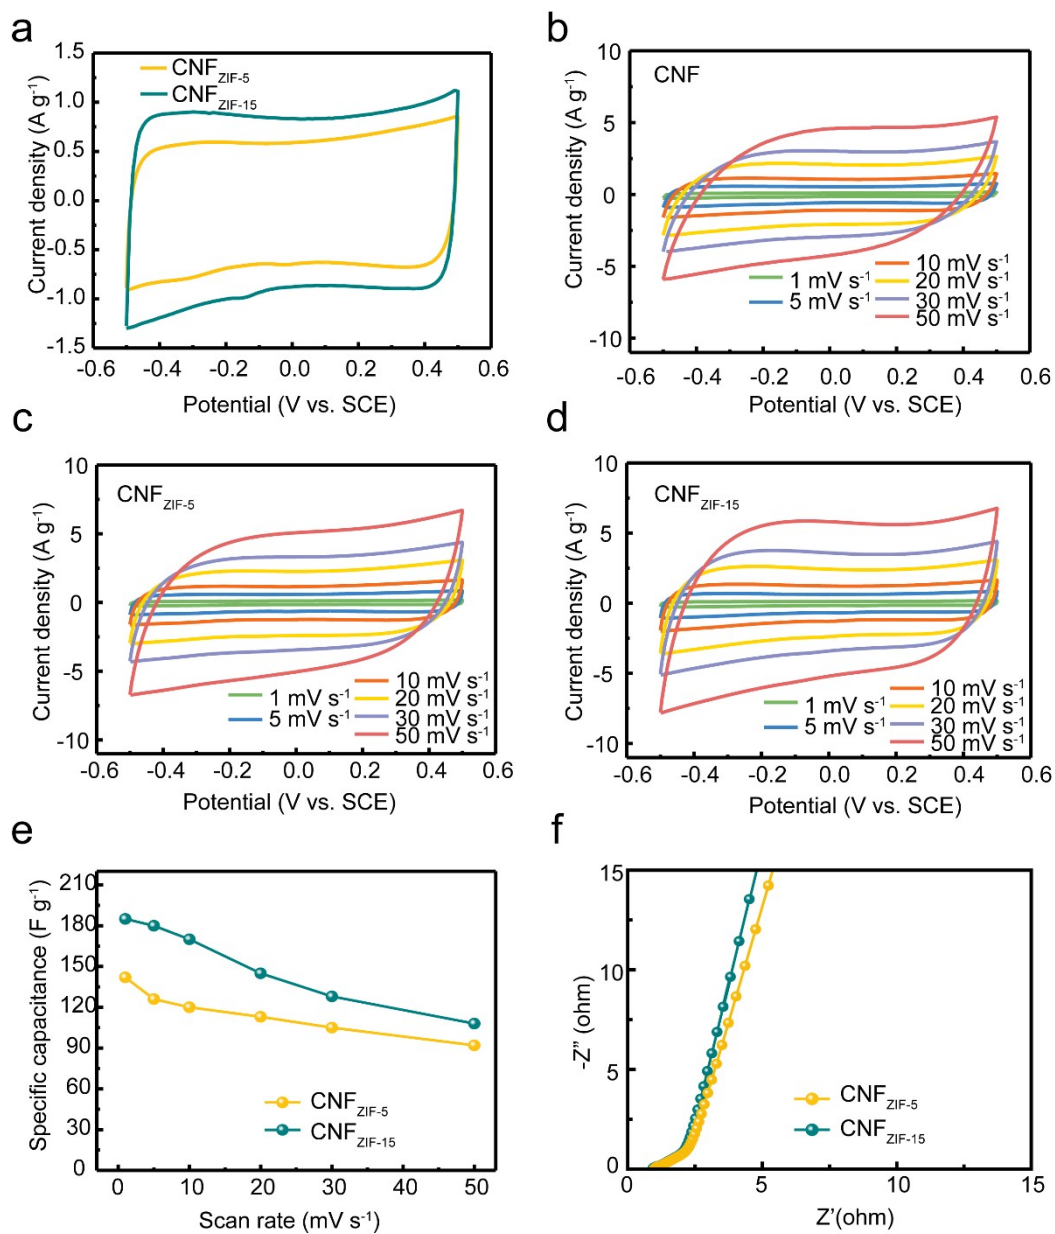

**Figure S7.** (a) CV curves of CNF<sub>ZIF-5</sub> and CNF<sub>ZIF-15</sub> at 5 mV s<sup>-1</sup>; (b) CV curves of CNF, (c) CNF<sub>ZIF-5</sub>, and (d) CNF<sub>ZIF-15</sub> at different scan rates. (e) specific capacitance versus scan rate and (f) Nyquist plots of CNF<sub>ZIF-5</sub> and CNF<sub>ZIF-15</sub>.

**Table S3** The  $R_{ct}$  values of  $C_{ZIF}$ , CNF, and  $CNF_{ZIF-X}$  electrodes.

| Samples               | $C_{ZIF}$ | CNF  | $CNF_{ZIF-5}$ | $CNF_{ZIF-10}$ | $CNF_{ZIF-15}$ |
|-----------------------|-----------|------|---------------|----------------|----------------|
| $R_{ct}$ ( $\Omega$ ) | 0.27      | 1.27 | 0.24          | 0.11           | 0.20           |

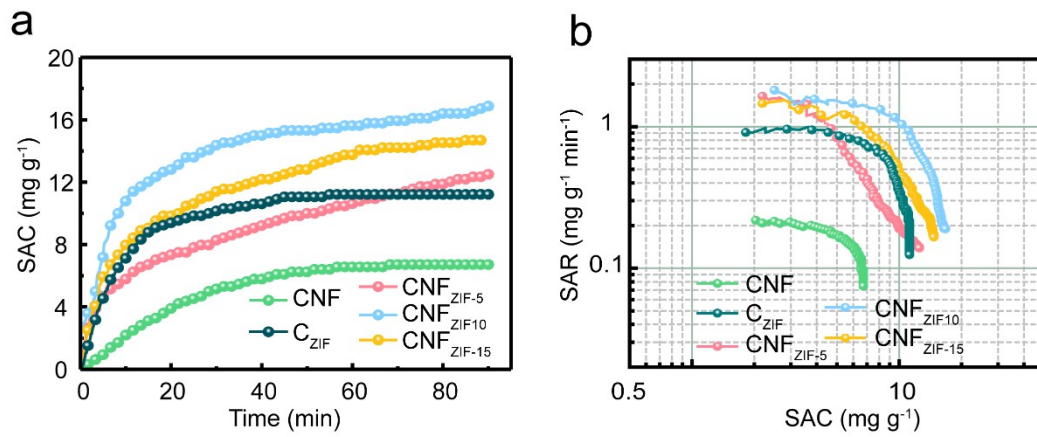

**Figure S8.** (a) The SAC curves and (b) CDI Ragone plots of CNF,  $CNF_{ZIF-X}$ , and  $C_{ZIF}$  in a  $500\ mg\ L^{-1}$  NaCl solution.

**Table S4** Comparison of the CDI performance of various electrode materials in a NaCl solution.

| Sample                | Initial concentration<br>(mg L <sup>-1</sup> ) | Voltage<br>(V) | SAC<br>(mg g <sup>-1</sup> ) | Ref.             |
|-----------------------|------------------------------------------------|----------------|------------------------------|------------------|
| mGE                   | 500                                            | 1.2            | 14.2                         | <b>S1</b>        |
| N-HMCSs               | 500                                            | 1.2            | 16.6                         | <b>S2</b>        |
| PCN6                  | 1000                                           | 1.2            | 16.26                        | <b>S3</b>        |
| ZIF-67/CNT            | ~300                                           | 1.2            | 10.3                         | <b>S4</b>        |
| ECAG                  | ~87                                            | 1.8            | 14.25                        | <b>S5</b>        |
| PCS                   | 500                                            | 1.2            | 10.3                         | <b>S6</b>        |
| PCP1200               | 500                                            | 1.2            | 13.89                        | <b>S7</b>        |
| GR/NMC                | 500                                            | 1.2            | 14.5                         | <b>S8</b>        |
| SCZs                  | 500                                            | 1.2            | 15.31                        | <b>S9</b>        |
| MOF/PPy               | 500                                            | 1.2            | 11.34                        | <b>S10</b>       |
| CNF <sub>ZIF-10</sub> | 100                                            |                | 8.59                         |                  |
|                       | 500                                            | 1.2            | 16.89                        | <b>This work</b> |
|                       | 800                                            |                | 19.69                        |                  |

**References:**

- S1. X. Xu, Y. Liu, M. Wang, X. Yang, C. Zhu, T. Lu, R. Zhao and L. Pan, *Electrochim. Acta*, 2016, **188**, 406-413.
- S2. Y. Li, J. Qi, J. Li, J. Shen, Y. Liu, X. Sun, J. Shen, W. Han and L. Wang, *ACS Sustain. Chem. Eng.*, 2017, **5**, 6635-6644.
- S3. T. Lu, Y. Liu, X. Xu, L. Pan, A. A. Allothman, J. Shapter, Y. Wang and Y. Yamauchi, *Sep. Purif. Technol.*, 2020, **256**, 117771.
- S4. X. Xu, C. Li, C. Wang, L. Ji, Y. V. Kaneti, H. Huang, T. Yang, K. C. W. Wu and Y. Yamauchi, *ACS Sustain. Chem. Eng.*, 2019, **7**, 13949-13954.
- S5. M. S. Zoromba, M. H. Abdel-Aziz, M. Bassyouni, S. Gutub, D. Demko and A. Abdelkader, *ACS Sustain. Chem. Eng.*, 2017, **5**, 4573-4581.
- S6. Y. Li, X. Xu, S. Hou, J. Ma, T. Lu, J. Wang, Y. Yao and L. Pan, *Chem. Commun.*, 2018, **54**, 14009-14012.
- S7. Y. Liu, X. Xu, M. Wang, T. Lu, Z. Sun and L. Pan, *Chem. Commun.*, 2015, **51**, 12020-12023.



- S8. T. Yan, J. Liu, H. Lei, L. Shi, Z. An, H. S. Park and D. Zhang, *Environ. Sci. Nano*., 2018, **5**, 2722-2730.
- S9. J. Shen, Y. Li, C. Wang, R. Luo, J. Li, X. Sun, J. Shen, W. Han and L. Wang, *Electrochim. Acta*, 2018, **273**, 34-42.
- S10. Z. Wang, X. Xu, J. Kim, V. Malgras, R. Mo, C. Li, Y. Lin, H. Tan, J. Tang, L. Pan, Y. Bando, T. Yang and Y. Yamauchi, *Mater. Horizons*, 2019, **6**, 1433-1437.
